# Supplementary material for: Construction of donor-mediator-receptor heterojunctions: Ni12P5/In(OH)3/CdIn2S4 ternary catalyst for photocatalytic hydrogen production
Source: Royal Society of Chemistry journal article supplement (doi:10.1039/d2nj06285b), 2023-01-01
Supplement: d2nj06285b1.pdf [file d2nj06285b1.pdf]

## Electronic Supplementary Information

### Construction of donor-mediator-receptor heterojunctions: $\text{Ni}_{12}\text{P}_5/\text{In}(\text{OH})_3/\text{CdIn}_2\text{S}_4$ ternary catalyst for photocatalytic hydrogen production

Wenwen Yang<sup>a</sup>, Shan-Shan Xu<sup>b</sup>, Yawen Niu<sup>a</sup>, Yanhui Zhang<sup>a</sup>, Jian-Feng Li<sup>b</sup>, Juan

Xu<sup>\*a</sup>

<sup>a</sup>College of Chemistry, Chemical Engineering and Environment, Fujian Province Key

Laboratory of Modern Analytical Science and Separation Technology, Minnan

Normal University, Zhangzhou 363000, China.

<sup>b</sup>College of Physical Science and Technology, College of Materials, State Key

Laboratory of Physical Chemistry of Solid Surfaces, College of Chemistry and

Chemical Engineering, College of Energy, Fujian Key Laboratory of Advanced

Materials, Xiamen University, Xiamen 361005, China.

\*Corresponding Author, Email: xjzhejiang.2008@163.com

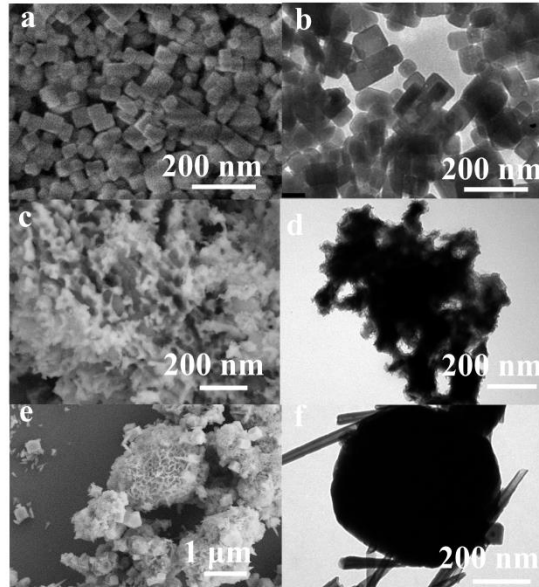

Fig. S1 The SEM images and TEM images of  $\text{In}(\text{OH})_3$  **a-b**,  $\text{Ni}_{12}\text{P}_5$  **c-d**, and 1%  $\text{In}(\text{OH})_3/\text{CIS}$  **e-f**.

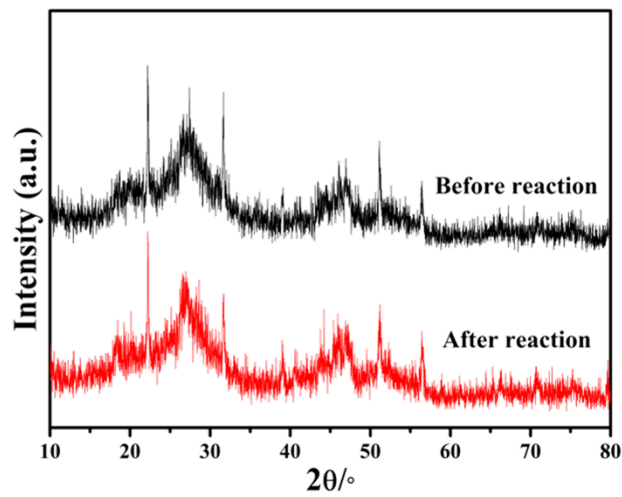

Fig. S2 XRD patterns of 5%  $\text{Ni}_{12}\text{P}_5/\text{In}(\text{OH})_3/\text{CIS}$  sample before and after the photocatalytic reaction.
